# Supplementary material for: Risk factors related to the recurrence of pneumothorax in patients with emphysema
Source: PubMed Central journal article supplement — J Thorac Dis. 2020 Oct;12(10):5802–10. doi: 10.21037/jtd-20-1557B (PMC7656424; doi:10.21037/jtd-20-1557b), 2020-10
Supplement: jtd-12-10-5802-dss.pdf [file jtd-12-10-5802-dss.pdf]

## Data Sharing Statement

|                     |                                                                                                                                                    |                                                                                                                                                                                                                                                                  |
|---------------------|----------------------------------------------------------------------------------------------------------------------------------------------------|------------------------------------------------------------------------------------------------------------------------------------------------------------------------------------------------------------------------------------------------------------------|
| <b>Article Info</b> | <a href="http://dx.doi.org/10.21037/jtd-20-1557B">http://dx.doi.org/10.21037/jtd-20-1557B</a> .                                                    |                                                                                                                                                                                                                                                                  |
| <b>Item</b>         | <b>Question</b>                                                                                                                                    | <b>Authors' Response<br/>(place "-" if not applicable)</b>                                                                                                                                                                                                       |
| 1                   | Would you like to share data collected for your study to others?                                                                                   | Yes                                                                                                                                                                                                                                                              |
| 2                   | If not, would you like to share the reason for your decision?                                                                                      | -                                                                                                                                                                                                                                                                |
| 3                   | What data in particular will be shared?                                                                                                            | The prognostic factors related to recurrence of secondary spontaneous pneumothorax will be shared.                                                                                                                                                               |
| 4                   | Any other documents will be share? Such as study protocol, statistical analysis plan, informed consent form, clinical study report, analytic code. | -                                                                                                                                                                                                                                                                |
| 5                   | When will data availability begin?                                                                                                                 | From the publication date.                                                                                                                                                                                                                                       |
| 6                   | When will data availability end?                                                                                                                   | One years within the publication date                                                                                                                                                                                                                            |
| 7                   | To whom will you share the data?                                                                                                                   | Thoracic surgeons who are interested in studies of secondary spontaneous pneumothorax                                                                                                                                                                            |
| 8                   | For what type of analysis or purpose?                                                                                                              | For analysis to evaluate the risk factors related to the recurrence of pneumothorax in patients with emphysema                                                                                                                                                   |
| 9                   | How or where can the data/documents be obtained?                                                                                                   | Emails could be sent to the address below to obtain the shared data: bsshin83@gmail.com                                                                                                                                                                          |
| 10                  | Any other restrictions?                                                                                                                            | Before you use our dataset, you need to be approved by our institution's Ethics Committee, Institutional Review Board for Human Research of Yonsei University Wonju Severance Christian Hospital. (contact via [+82] 033-741-1702, or E-mail: irb@yonsei.ac.kr). |
